# Supplementary material
Source: Springer Nature journal article supplement (https://www.springermedizin.de/resource/supplementary/12885_2011_2850_MOESM3_ESM.pdf/9462100)

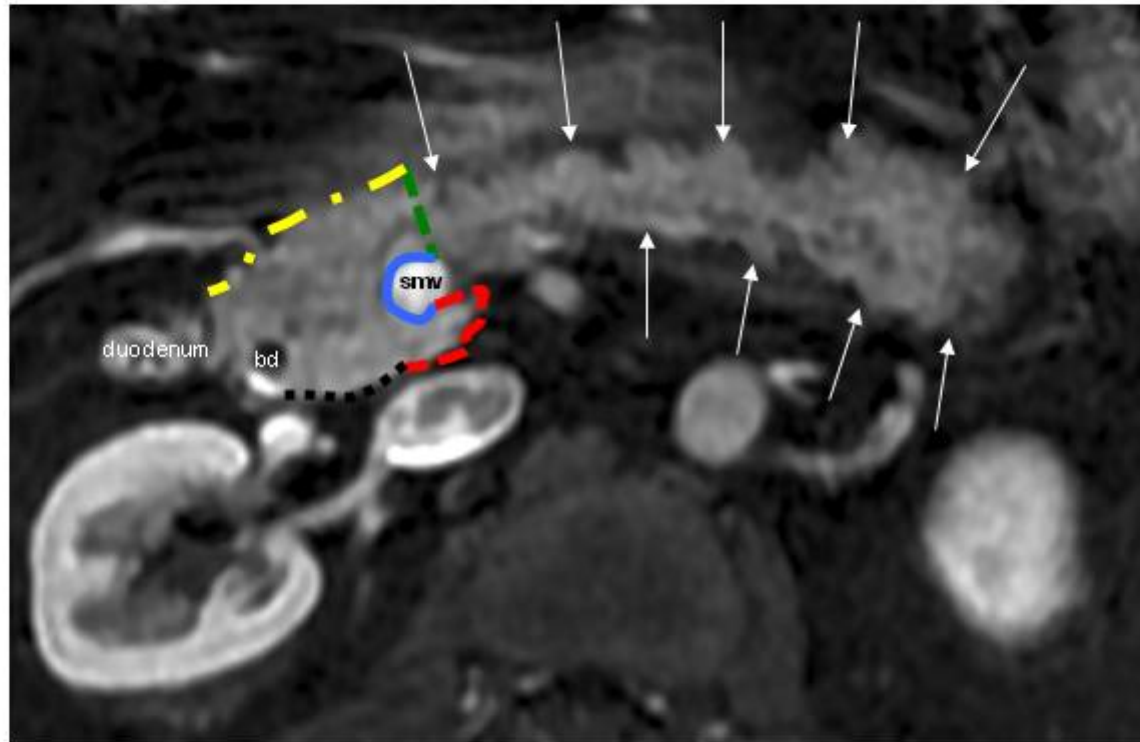

Anterior surface  
 Pancreas margin  
 Groove of the smv  
 Mesopancreas (sma)  
 Posterior surface

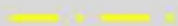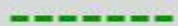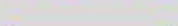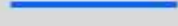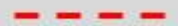

Supplement: MOESM3 [file 9462100]
